# Supplementary material
Source: Royal Society of Chemistry journal article supplement (https://www.rsc.org/suppdata/cc/1999/2405/906764g.doc)
Supplement: Supplementary file 1 [file 906764g.doc]

# **Supplementary data**

**Transition metal Kinamycin model as DNA-photocleavers for hypoxic environments: bis(9-diazo-4,5-diazafluorene) copper(ii) nitrate**

**Hilary J. Eppley,*a* Susan M. Lato,*a* Andrew D. Ellington*b* and Jeffrey M. Zaleski**a***

*a Department of Chemistry and Biochemistry, Indiana University, Bloomington, IN 47405, USA*

*b Department of Molecular Biology, University of Texas, Austin, TX 78712, USA*

**Characterization of compound 2**

9-Diazo-4,5-diazafluorene (**2**) was characterized by elemental analysis, NMR spectroscopy (8.72 (dd, 2H, *J* = 1.5, 4.7Hz) 7.91 (dd, 2H, *J* = 1.5, 8.0 Hz), 7.39 (dd, 2H, *J* = 4.7, 8.0 Hz), IR spectroscopy (KBr, cm-1: 2060(vs)) and EI MS (m/z 194.1 (M+)). Complex 3 was synthesized by addition of Cu(NO3)2.2.5H2O (46 mg, 0.20 mmol) in 5 mL of methanol dropwise to a solution of 9-diazo-4,5-diazafluorene (76 mg, 0.39 mmol) in 15 mL of methanol in the dark. The solution turned from orange to green and the solution was stirred briefly. The reaction mixture was allowed to stand in the refrigerator overnight and then filtered to remove the microcrystalline green solid. The solid was washed with MeOH and dried in vacuo for 2h. Yield: 94 mg, 82% based on Cu. The compound gave satisfactory elemental analysis, IR, UV-vis, and EPR spectroscopy, and was characterized by X-ray crystallography.

**DNA-cleavage assays**

Samples were prepared anaerobically in the dark, and photolyses were carried out using a 1000 W Xe lamp with the photolysis wavelength modulated using a series of UV filters and the appropriate long-pass cutoff wavelength filter. Control samples were incubated at room temperature in the dark. All samples were quenched in liquid nitrogen after the photolysis or thermal incubation was complete, and stored at -20ºC. Aliquots of the samples (6 L) were loaded on a 2% non-denaturing agarose gel, run out at 60V for 3 h, and stained with ethidium bromide.
